# Supplementary material for: Syntheses, structures, and magnetic properties of the lanthanide complexes of imidazole-substituted nitronyl nitroxide biradicals
Source: Royal Society of Chemistry journal article supplement (doi:10.1039/d2dt01652d), 2022-01-01
Supplement: d2dt01652d1.pdf [file d2dt01652d1.pdf]

## Supporting Information

### Syntheses, Structures, and Magnetic Properties of Lanthanide Complexes of Imidazole-Substituted Nitronyl Nitroxide Biradicals

Cheng-Cai Xia,<sup>a</sup> Wen-Jie Ji,<sup>a</sup> Xin-Yu Zhang,<sup>a</sup> Hao Miao,<sup>a</sup> Yi-Quan Zhang<sup>\*b</sup> and Xin-Yi Wang<sup>\*a</sup>

<sup>a</sup>State Key Laboratory of Coordination Chemistry, Collaborative Innovation Center of Advanced Microstructures, School of Chemistry and Chemical Engineering, Nanjing University, Nanjing, 210023, China. E-mail: wangxy66@nju.edu.cn

<sup>b</sup>Jiangsu Key Laboratory for NSLSCS, School of Physical Science and Technology, Nanjing Normal University, Nanjing 210023, China. E-mail: zhangyiquan@njnu.edu.cn

|                                                                                                                                                                                                                       |    |
|-----------------------------------------------------------------------------------------------------------------------------------------------------------------------------------------------------------------------|----|
| 1. X-ray crystallography and powder x-ray diffraction .....                                                                                                                                                           | 2  |
| Table S1 Selected bond lengths [Å] and angles [°] for complex 1 <sub>Gd</sub> .....                                                                                                                                   | 2  |
| Table S2 Selected bond lengths [Å] and angles [°] for complex 2 <sub>Tb</sub> .....                                                                                                                                   | 3  |
| Table S3 Selected bond lengths [Å] and angles [°] for complex 3 <sub>Dy</sub> .....                                                                                                                                   | 4  |
| Table S4 Selected bond lengths [Å] and angles [°] for complex 4 <sub>Gd</sub> .....                                                                                                                                   | 4  |
| Table S5 Selected bond lengths [Å] and angles [°] for complex 5 <sub>Tb</sub> .....                                                                                                                                   | 5  |
| Table S6 Selected bond lengths [Å] and angles [°] for complex 6 <sub>Dy</sub> .....                                                                                                                                   | 5  |
| Table S7 SHAPE analyses for 1 <sub>Gd</sub> -6 <sub>Dy</sub> .....                                                                                                                                                    | 6  |
| Figure S1 X-ray powder diffraction patterns of complexes 1 <sub>Gd</sub> -6 <sub>Dy</sub> .....                                                                                                                       | 7  |
| 2. Synthesis of BNITImH-C2/-C4 biradicals and Packing diagrams of 1 <sub>Gd</sub> -6 <sub>Dy</sub> .....                                                                                                              | 7  |
| Scheme S1 The synthesis of BNITImH-C2/-C4 biradicals.....                                                                                                                                                             | 7  |
| Figure S2 The chiral helical chains of 1 <sub>Gd</sub> -3 <sub>Dy</sub> along b axis in which H, F, MeOH molecules and nitrates are omitted for clarity. The helical chains are all of the same right-hand helix..... | 8  |
| Figure S3 Packing diagram of 1 <sub>Gd</sub> -3 <sub>Dy</sub> (H, F, and MeOH molecules are omitted).....                                                                                                             | 8  |
| Figure S4 Packing diagram of 4 <sub>Gd</sub> -6 <sub>Dy</sub> (H, F, and toluene molecules are omitted).....                                                                                                          | 8  |
| 3. Magnetic Properties .....                                                                                                                                                                                          | 9  |
| Figure S5 Frequency-dependent ac signals for 2 <sub>Tb</sub> (left) and 3 <sub>Dy</sub> (right) at 2 K under a 1000 Oe dc field. ....                                                                                 | 9  |
| Figure S6 Frequency-dependent ac signals for 6 <sub>Dy</sub> at 2 K under a 0 Oe dc field. ....                                                                                                                       | 9  |
| Table S8 Relaxation fitting parameters from the least-square fitting of the Cole-Cole plots of 5 <sub>Tb</sub> under a 0 Oe dc field according to the generalized Debye model.....                                    | 9  |
| Table S9 Relaxation fitting parameters from the least-square fitting of the Cole-Cole plots of 5 <sub>Tb</sub> under a 1000 Oe dc field according to the generalized Debye model.....                                 | 10 |
| 4. Details for calculations .....                                                                                                                                                                                     | 10 |
| Figure S7 Calculated structures of complexes 2 <sub>Tb</sub> and 5 <sub>Tb</sub> ; H atoms are omitted for clarity...11                                                                                               |    |
| Figure S8 Calculated orientations of the local main magnetic axes in the ground spin-orbit states on Tb <sup>III</sup> ions of 2 <sub>Tb</sub> and 5 <sub>Tb</sub> . ....                                             | 11 |

Table S10 Calculated energy levels ( $\text{cm}^{-1}$ ),  $g$  ( $g_x, g_y, g_z$ ) tensors, and predominant  $m_J$  values of the lowest seven spin-orbit states of individual  $\text{Tb}^{\text{III}}$  fragments of complexes  $2_{\text{Tb}}$  and  $5_{\text{Tb}}$  using CASSCF/RASSI-SO with OpenMolcas.....11

Table S11 Wave functions with definite projections of the total moment  $|m_J\rangle$  for the lowest two spin-orbit states of individual  $\text{Tb}^{\text{III}}$  fragments of  $2_{\text{Tb}}$  and  $5_{\text{Tb}}$  using CASSCF/RASSI-SO with OpenMolcas. ....12

Table S12 Calculated crystal-field parameters  $B(k, q)$  and the corresponding weights for individual  $\text{Tb}^{\text{III}}$  fragments of  $2_{\text{Tb}}$  and  $5_{\text{Tb}}$  using CASSCF/RASSI-SO with OpenMolcas.....12

Table S13 Exchange energies  $E$  ( $\text{cm}^{-1}$ ) and the main values of the  $g_z$  for the lowest two or four exchange doublets of  $2_{\text{Tb}}$  and  $5_{\text{Tb}}$ . ....13

Figure S9 Calculated (red solid line) and experimental (black circle dot) data of magnetic susceptibilities of  $2_{\text{Tb}}$  and  $5_{\text{Tb}}$ . The intermolecular interaction parameters  $zJ'$  of  $2_{\text{Tb}}$  and  $5_{\text{Tb}}$  were fitted to 0.000 and 0.020  $\text{cm}^{-1}$ , respectively. ....14

## 1. X-ray crystallography and powder x-ray diffraction

**Table S1** Selected bond lengths [ $\text{\AA}$ ] and angles [ $^\circ$ ] for complex  $1_{\text{Gd}}$ .

|                                |           |                                |            |
|--------------------------------|-----------|--------------------------------|------------|
| Gd(1)-O(2)                     | 2.399(2)  | O(7)-Gd(1)-O(11)               | 131.88(9)  |
| Gd(1)-O(4) <sup>#1</sup>       | 2.416(2)  | O(7)-Gd(1)-O(13)               | 155.32(9)  |
| Gd(1)-O(5)                     | 2.603(3)  | O(7)-Gd(1)-N(3)                | 115.20(9)  |
| Gd(1)-O(7)                     | 2.470(3)  | O(7)-Gd(1)-N(6) <sup>#1</sup>  | 71.67(9)   |
| Gd(1)-O(8)                     | 2.463(3)  | O(8)-Gd(1)-O(5)                | 70.06(9)   |
| Gd(1)-O(10)                    | 2.480(3)  | O(8)-Gd(1)-O(7)                | 78.15(9)   |
| Gd(1)-O(11)                    | 2.539(3)  | O(8)-Gd(1)-O(10)               | 52.09(10)  |
| Gd(1)-O(13)                    | 2.498(3)  | O(8)-Gd(1)-O(11)               | 116.86(10) |
| Gd(1)-N(3)                     | 2.601(3)  | O(8)-Gd(1)-O(13)               | 124.94(10) |
| Gd(1)-N(6) <sup>#1</sup>       | 2.604(3)  | O(8)-Gd(1)-N(3)                | 76.70(8)   |
| O(1)-N(1)                      | 1.266(4)  | O(8)-Gd(1)-N(6) <sup>#1</sup>  | 74.21(9)   |
| O(2)-N(2)                      | 1.285(3)  | O(10)-Gd(1)-O(5)               | 115.66(9)  |
| O(3)-N(8)                      | 1.278(4)  | O(10)-Gd(1)-O(11)              | 69.68(10)  |
| O(4)-N(7)                      | 1.291(3)  | O(10)-Gd(1)-O(13)              | 78.31(10)  |
| O(2)-Gd(1)-O(4) <sup>#1</sup>  | 70.73(8)  | O(10)-Gd(1)-N(3)               | 75.34(8)   |
| O(2)-Gd(1)-O(5)                | 70.33(9)  | O(10)-Gd(1)-N(6) <sup>#1</sup> | 76.13(9)   |
| O(2)-Gd(1)-O(7)                | 88.24(9)  | O(11)-Gd(1)-O(5)               | 172.70(10) |
| O(2)-Gd(1)-O(8)                | 137.35(9) | O(11)-Gd(1)-N(3)               | 112.78(9)  |
| O(2)-Gd(1)-O(10)               | 140.89(9) | O(11)-Gd(1)-N(6) <sup>#1</sup> | 69.93(9)   |
| O(2)-Gd(1)-O(11)               | 102.37(9) | O(13)-Gd(1)-O(5)               | 124.71(8)  |
| O(2)-Gd(1)-O(13)               | 68.89(9)  | O(13)-Gd(1)-O(11)              | 50.07(9)   |
| O(2)-Gd(1)-N(3)                | 73.05(8)  | O(13)-Gd(1)-N(3)               | 68.03(9)   |
| O(2)-Gd(1)-N(6) <sup>#1</sup>  | 138.94(8) | O(13)-Gd(1)-N(6) <sup>#1</sup> | 119.71(9)  |
| O(4) <sup>#1</sup> -Gd(1)-O(5) | 105.18(8) | N(3)-Gd(1)-O(5)                | 65.47(9)   |
| O(4) <sup>#1</sup> -Gd(1)-O(7) | 67.89(9)  | N(3)-Gd(1)-N(6) <sup>#1</sup>  | 147.85(8)  |
| O(4) <sup>#1</sup> -Gd(1)-O(8) | 135.58(9) | N(2)-O(2)-Gd(1)                | 131.03(18) |

|                                 |           |                                              |            |
|---------------------------------|-----------|----------------------------------------------|------------|
| O(4) <sup>#1</sup> -Gd(1)-O(10) | 134.52(9) | N(7)-O(4)-Gd(1) <sup>#2</sup>                | 124.61(19) |
| O(4) <sup>#1</sup> -Gd(1)-O(11) | 71.80(9)  | O(4) <sup>#1</sup> -Gd(1)-N(3)               | 143.55(8)  |
| O(4) <sup>#1</sup> -Gd(1)-O(13) | 94.85(9)  | O(4) <sup>#1</sup> -Gd(1)-N(6) <sup>#1</sup> | 68.59(8)   |
| O(5)-Gd(1)-N(6) <sup>#1</sup>   | 115.57(9) | O(7)-Gd(1)-O(10)                             | 126.35(9)  |
| O(7)-Gd(1)-O(5)                 | 49.88(8)  |                                              |            |

Symmetry transformations used to generate equivalent atoms: <sup>#1</sup> 1-X, 1/2+Y, 1/2-Z; <sup>#2</sup> 1-X, -1/2+Y, 1/2-

Z

**Table S2** Selected bond lengths [Å] and angles [°] for complex **2<sub>Tb</sub>**.

|                                              |            |                                |            |
|----------------------------------------------|------------|--------------------------------|------------|
| Tb(1)-O(8)                                   | 2.606(4)   | O(4) <sup>#1</sup> -Tb(1)-O(7) | 136.93(14) |
| Tb(1)-O(2)                                   | 2.399(4)   | N(6) <sup>#1</sup> -Tb(1)-O(8) | 65.39(14)  |
| Tb(1)-O(4) <sup>#1</sup>                     | 2.387(3)   | O(13)-Tb(1)-O(8)               | 124.40(13) |
| Tb(1)-N(6) <sup>#1</sup>                     | 2.591(5)   | O(13)-Tb(1)-N(6) <sup>#1</sup> | 67.86(14)  |
| Tb(1)-O(13)                                  | 2.479(4)   | O(13)-Tb(1)-O(11)              | 50.58(14)  |
| Tb(1)-O(11)                                  | 2.535(4)   | O(13)-Tb(1)-N(3)               | 120.04(14) |
| Tb(1)-O(10)                                  | 2.447(4)   | O(11)-Tb(1)-O(8)               | 173.00(16) |
| Tb(1)-N(3)                                   | 2.590(5)   | O(11)-Tb(1)-N(6) <sup>#1</sup> | 112.93(14) |
| Tb(1)-O(5)                                   | 2.468(4)   | O(11)-Tb(1)-N(3)               | 69.75(15)  |
| Tb(1)-O(7)                                   | 2.449(4)   | O(10)-Tb(1)-O(8)               | 50.10(14)  |
| O(2)-N(2)                                    | 1.297(6)   | O(10)-Tb(1)-N(6) <sup>#1</sup> | 115.32(14) |
| O(1)-N(1)                                    | 1.281(6)   | O(10)-Tb(1)-O(13)              | 155.43(15) |
| N(9)-O(9)                                    | 1.221(6)   | O(10)-Tb(1)-O(11)              | 131.66(14) |
| O(4)-N(7)                                    | 1.275(5)   | O(10)-Tb(1)-N(3)               | 71.52(15)  |
| O(3)-N(8)                                    | 1.274(6)   | O(10)-Tb(1)-O(5)               | 125.98(15) |
| O(2)-Tb(1)-O(8)                              | 105.44(14) | O(10)-Tb(1)-O(7)               | 78.02(15)  |
| O(2)-Tb(1)-N(6) <sup>#1</sup>                | 143.63(13) | N(3)-Tb(1)-O(8)                | 115.56(14) |
| O(2)-Tb(1)-O(13)                             | 94.77(14)  | N(3)-Tb(1)-N(6) <sup>#1</sup>  | 147.44(15) |
| O(2)-Tb(1)-O(11)                             | 71.67(14)  | O(5)-Tb(1)-O(8)                | 115.63(15) |
| O(2)-Tb(1)-O(10)                             | 68.13(15)  | O(5)-Tb(1)-N(6) <sup>#1</sup>  | 75.45(14)  |
| O(2)-Tb(1)-N(3)                              | 68.92(14)  | O(5)-Tb(1)-O(13)               | 78.58(15)  |
| O(2)-Tb(1)-O(5)                              | 134.27(14) | O(5)-Tb(1)-O(11)               | 69.49(16)  |
| O(2)-Tb(1)-O(7)                              | 135.82(14) | O(5)-Tb(1)-N(3)                | 75.67(15)  |
| O(4) <sup>#1</sup> -Tb(1)-O(8)               | 69.96(13)  | O(7)-Tb(1)-O(8)                | 69.92(14)  |
| O(4) <sup>#1</sup> -Tb(1)-O(2)               | 70.73(13)  | O(7)-Tb(1)-N(6) <sup>#1</sup>  | 76.47(14)  |
| O(4) <sup>#1</sup> -Tb(1)-N(6) <sup>#1</sup> | 73.19(13)  | O(7)-Tb(1)-O(13)               | 124.89(15) |
| O(4) <sup>#1</sup> -Tb(1)-O(13)              | 69.12(14)  | O(7)-Tb(1)-O(11)               | 116.70(16) |
| O(4) <sup>#1</sup> -Tb(1)-O(11)              | 103.05(15) | O(7)-Tb(1)-N(3)                | 74.06(16)  |
| O(4) <sup>#1</sup> -Tb(1)-O(10)              | 88.08(15)  | O(7)-Tb(1)-O(5)                | 52.05(15)  |
| O(4) <sup>#1</sup> -Tb(1)-N(3)               | 139.17(14) | N(2)-O(2)-Tb(1)                | 124.8(3)   |
| O(4) <sup>#1</sup> -Tb(1)-O(5)               | 141.39(14) | N(7)-O(4)-Tb(1) <sup>#2</sup>  | 131.6(3)   |

Symmetry transformations used to generate equivalent atoms: <sup>#1</sup> 1-X, -1/2+Y, 1/2-Z; <sup>#2</sup> 1-X, 1/2+Y, 1/2-Z

**Table S3** Selected bond lengths [Å] and angles [°] for complex **3<sub>Dy</sub>**.

|                                              |            |                                |            |
|----------------------------------------------|------------|--------------------------------|------------|
| Dy(1)-O(4) <sup>#1</sup>                     | 2.407(3)   | N(7)-O(4)-Dy(1) <sup>#2</sup>  | 123.8(2)   |
| Dy(1)-O(2)                                   | 2.378(3)   | N(2)-O(2)-Dy(1)                | 130.5(2)   |
| Dy(1)-O(5)                                   | 2.633(3)   | N(6) <sup>#1</sup> -Dy(1)-O(5) | 116.40(11) |
| Dy(1)-O(7)                                   | 2.437(3)   | N(3)-Dy(1)-O(5)                | 65.03(10)  |
| Dy(1)-O(8)                                   | 2.438(3)   | N(3)-Dy(1)-N(6) <sup>#1</sup>  | 147.95(11) |
| Dy(1)-O(10)                                  | 2.438(3)   | O(7)-Dy(1)-O(5)                | 49.91(10)  |
| Dy(1)-O(13)                                  | 2.487(3)   | O(7)-Dy(1)-O(8)                | 77.08(11)  |
| Dy(1)-O(11)                                  | 2.526(3)   | O(7)-Dy(1)-O(10)               | 124.92(12) |
| Dy(1)-N(6) <sup>#1</sup>                     | 2.546(3)   | O(7)-Dy(1)-O(13)               | 156.00(12) |
| Dy(1)-N(3)                                   | 2.545(3)   | O(7)-Dy(1)-O(11)               | 132.02(10) |
| O(4)-N(7)                                    | 1.293(4)   | O(7)-Dy(1)-N(6) <sup>#1</sup>  | 71.38(11)  |
| O(3)-N(8)                                    | 1.269(5)   | O(7)-Dy(1)-N(3) <sup>#1</sup>  | 114.53(11) |
| O(1)-N(1)                                    | 1.280(5)   | O(8)-Dy(1)-O(5)                | 70.21(11)  |
| O(2)-N(2)                                    | 1.290(4)   | O(8)-Dy(1)-O(13)               | 124.79(11) |
| O(4) <sup>#1</sup> -Dy(1)-O(5)               | 103.72(10) | O(8)-Dy(1)-O(11)               | 118.99(12) |
| O(4) <sup>#1</sup> -Dy(1)-O(7)               | 68.45(11)  | O(8)-Dy(1)-N(6) <sup>#1</sup>  | 75.56(11)  |
| O(4) <sup>#1</sup> -Dy(1)-O(8)               | 136.73(11) | O(8)-Dy(1)-N(3)                | 75.44(11)  |
| O(4) <sup>#1</sup> -Dy(1)-O(10)              | 134.91(11) | O(10)-Dy(1)-O(5)               | 116.92(11) |
| O(4) <sup>#1</sup> -Dy(1)-O(13)              | 95.05(11)  | O(10)-Dy(1)-O(8)               | 52.52(12)  |
| O(4) <sup>#1</sup> -Dy(1)-O(11)              | 71.68(11)  | O(10)-Dy(1)-O(13)              | 79.07(12)  |
| O(4) <sup>#1</sup> -Dy(1)-N(6) <sup>#1</sup> | 69.32(11)  | O(10)-Dy(1)-O(11)              | 70.55(12)  |
| O(4) <sup>#1</sup> -Dy(1)-N(3)               | 142.73(10) | O(10)-Dy(1)-N(6) <sup>#1</sup> | 75.46(11)  |
| O(2)-Dy(1)-O(4) <sup>#1</sup>                | 69.21(10)  | O(10)-Dy(1)-N(3)               | 76.23(11)  |
| O(2)-Dy(1)-O(5)                              | 69.47(11)  | O(13)-Dy(1)-O(5)               | 123.27(10) |
| O(2)-Dy(1)-O(7)                              | 88.93(11)  | O(13)-Dy(1)-O(11)              | 50.33(10)  |
| O(2)-Dy(1)-O(8)                              | 136.62(11) | O(13)-Dy(1)-N(6) <sup>#1</sup> | 120.32(11) |
| O(2)-Dy(1)-O(10)                             | 141.98(11) | O(13)-Dy(1)-N(3)               | 67.86(11)  |
| O(2)-Dy(1)-O(13)                             | 68.44(11)  | O(11)-Dy(1)-O(5)               | 170.44(12) |
| O(2)-Dy(1)-O(11)                             | 100.97(11) | O(11)-Dy(1)-N(6) <sup>#1</sup> | 70.37(11)  |
| O(2)-Dy(1)-N(6) <sup>#1</sup>                | 138.22(10) | O(11)-Dy(1)-N(3)               | 113.30(11) |
| O(2)-Dy(1)-N(3)                              | 73.65(10)  |                                |            |

Symmetry transformations used to generate equivalent atoms: <sup>#1</sup> 1-X, -1/2+Y, 3/2-Z; <sup>#2</sup> 1-X, 1/2+Y, 3/2-Z**Table S4** Selected bond lengths [Å] and angles [°] for complex **4<sub>Gd</sub>**.

|            |          |                 |           |
|------------|----------|-----------------|-----------|
| Gd(1)-O(2) | 2.366(2) | O(2)-Gd(1)-O(3) | 76.51(8)  |
| Gd(1)-O(3) | 2.388(2) | O(2)-Gd(1)-O(5) | 141.49(7) |
| Gd(1)-O(4) | 2.345(2) | O(2)-Gd(1)-O(6) | 81.31(7)  |
| Gd(1)-O(5) | 2.370(2) | O(2)-Gd(1)-O(7) | 142.12(7) |
| Gd(1)-O(6) | 2.411(2) | O(2)-Gd(1)-N(2) | 70.50(8)  |
| Gd(1)-O(7) | 2.372(2) | O(3)-Gd(1)-O(6) | 147.29(8) |
| Gd(1)-O(8) | 2.326(2) | O(3)-Gd(1)-N(2) | 119.29(9) |

|                 |            |                 |           |
|-----------------|------------|-----------------|-----------|
| Gd(1)-N(2)      | 2.520(2)   | O(4)-Gd(1)-O(2) | 108.56(8) |
| O(1)-N(3)       | 1.268(3)   | O(4)-Gd(1)-O(3) | 71.23(9)  |
| O(2)-N(4)       | 1.296(3)   | O(4)-Gd(1)-O(5) | 78.01(8)  |
| O(7)-Gd(1)-O(6) | 112.56(8)  | O(4)-Gd(1)-O(6) | 139.67(8) |
| O(7)-Gd(1)-N(2) | 146.10(8)  | O(4)-Gd(1)-O(7) | 83.96(8)  |
| O(8)-Gd(1)-O(2) | 77.29(8)   | O(4)-Gd(1)-N(2) | 73.13(8)  |
| O(8)-Gd(1)-O(3) | 76.07(8)   | O(5)-Gd(1)-O(3) | 138.27(8) |
| O(8)-Gd(1)-O(4) | 144.00(8)  | O(5)-Gd(1)-O(6) | 71.81(7)  |
| O(8)-Gd(1)-O(5) | 120.16(8)  | O(5)-Gd(1)-O(7) | 75.22(7)  |
| O(8)-Gd(1)-O(6) | 75.80(7)   | O(5)-Gd(1)-N(2) | 75.80(8)  |
| O(8)-Gd(1)-O(7) | 72.84(8)   | O(6)-Gd(1)-N(2) | 73.98(8)  |
| O(8)-Gd(1)-N(2) | 138.42(8)  | O(7)-Gd(1)-O(3) | 74.13(8)  |
| N(4)-O(2)-Gd(1) | 126.89(17) |                 |           |

**Table S5** Selected bond lengths [Å] and angles [°] for complex **5<sub>Tb</sub>**.

|                 |            |                 |            |
|-----------------|------------|-----------------|------------|
| Tb(1)-O(2)      | 2.360(3)   | O(2)-Tb(1)-O(3) | 76.04(11)  |
| Tb(1)-O(6)      | 2.395(3)   | O(2)-Tb(1)-N(2) | 70.76(11)  |
| Tb(1)-O(5)      | 2.357(3)   | O(6)-Tb(1)-N(2) | 74.28(12)  |
| Tb(1)-O(8)      | 2.317(3)   | O(5)-Tb(1)-O(2) | 141.78(10) |
| Tb(1)-O(7)      | 2.356(3)   | O(5)-Tb(1)-O(6) | 72.00(11)  |
| Tb(1)-O(4)      | 2.332(3)   | O(5)-Tb(1)-O(3) | 138.56(11) |
| Tb(1)-O(3)      | 2.377(3)   | O(5)-Tb(1)-N(2) | 75.93(11)  |
| Tb(1)-N(2)      | 2.505(4)   | O(8)-Tb(1)-O(2) | 76.98(11)  |
| O(2)-N(4)       | 1.297(5)   | O(8)-Tb(1)-O(6) | 75.57(11)  |
| O(1)-N(3)       | 1.263(5)   | O(8)-Tb(1)-O(5) | 120.14(12) |
| O(4)-Tb(1)-O(2) | 108.85(12) | O(8)-Tb(1)-O(7) | 73.41(11)  |
| O(4)-Tb(1)-O(6) | 139.82(11) | O(8)-Tb(1)-O(4) | 144.06(11) |
| O(4)-Tb(1)-O(5) | 77.88(12)  | O(8)-Tb(1)-O(3) | 75.92(12)  |
| O(4)-Tb(1)-O(7) | 83.32(12)  | O(8)-Tb(1)-N(2) | 138.45(11) |
| O(4)-Tb(1)-O(3) | 71.56(12)  | O(7)-Tb(1)-O(2) | 142.13(10) |
| O(4)-Tb(1)-N(2) | 73.05(12)  | O(7)-Tb(1)-O(6) | 112.89(11) |
| O(3)-Tb(1)-O(6) | 146.79(11) | O(7)-Tb(1)-O(5) | 74.98(11)  |
| O(3)-Tb(1)-N(2) | 119.09(13) | O(7)-Tb(1)-O(3) | 74.28(12)  |
| N(4)-O(2)-Tb(1) | 126.8(2)   | O(7)-Tb(1)-N(2) | 145.65(11) |
| O(2)-Tb(1)-O(6) | 81.27(11)  |                 |            |

**Table S6** Selected bond lengths [Å] and angles [°] for complex **6<sub>Dy</sub>**.

|            |          |                 |            |
|------------|----------|-----------------|------------|
| Dy(1)-O(2) | 2.345(3) | O(2)-Dy(1)-O(3) | 75.29(9)   |
| Dy(1)-O(3) | 2.364(3) | O(2)-Dy(1)-O(5) | 142.31(9)  |
| Dy(1)-O(4) | 2.315(3) | O(2)-Dy(1)-O(6) | 81.54(9)   |
| Dy(1)-O(5) | 2.349(3) | O(2)-Dy(1)-N(2) | 70.87(9)   |
| Dy(1)-O(6) | 2.382(3) | O(3)-Dy(1)-O(6) | 146.12(9)  |
| Dy(1)-O(7) | 2.343(3) | O(3)-Dy(1)-N(2) | 119.11(11) |
| Dy(1)-O(8) | 2.302(3) | O(4)-Dy(1)-O(2) | 108.61(10) |

|                 |            |                 |           |
|-----------------|------------|-----------------|-----------|
| Dy(1)-N(2)      | 2.500(3)   | O(4)-Dy(1)-O(3) | 71.94(10) |
| O(1)-N(3)       | 1.270(4)   | O(4)-Dy(1)-O(5) | 77.89(10) |
| O(2)-N(4)       | 1.299(4)   | O(4)-Dy(1)-O(6) | 140.09(9) |
| O(8)-Dy(1)-O(2) | 77.21(10)  | O(4)-Dy(1)-O(7) | 83.21(10) |
| O(8)-Dy(1)-O(3) | 75.76(10)  | O(4)-Dy(1)-N(2) | 73.11(10) |
| O(8)-Dy(1)-O(6) | 75.23(9)   | O(5)-Dy(1)-O(3) | 138.84(9) |
| O(8)-Dy(1)-O(7) | 73.43(9)   | O(5)-Dy(1)-O(6) | 72.31(9)  |
| O(8)-Dy(1)-O(4) | 144.11(9)  | O(5)-Dy(1)-N(2) | 76.18(10) |
| O(8)-Dy(1)-O(5) | 119.78(10) | O(6)-Dy(1)-N(2) | 74.44(10) |
| O(8)-Dy(1)-N(2) | 138.48(9)  | O(7)-Dy(1)-O(2) | 142.09(9) |
| N(4)-O(2)-Dy(1) | 126.9(2)   | O(7)-Dy(1)-O(3) | 74.65(10) |
| O(7)-Dy(1)-O(6) | 112.81(10) | O(7)-Dy(1)-O(5) | 74.57(9)  |
| O(7)-Dy(1)-N(2) | 145.52(10) |                 |           |

**Table S7** SHAPE analyses for  $1_{\text{Gd}}-6_{\text{Dy}}$ .

| Complexes<br>Label | $1_{\text{Gd}}$ | $2_{\text{Tb}}$ | $3_{\text{Dy}}$ | Complexes<br>Label | $4_{\text{Gd}}$ | $5_{\text{Tb}}$ | $6_{\text{Dy}}$ |
|--------------------|-----------------|-----------------|-----------------|--------------------|-----------------|-----------------|-----------------|
| OBPY-10            | 17.392          | 17.330          | 17.499          | HBPY-8             | 16.411          | 16.558          | 16.601          |
| PPR-10             | 11.089          | 11.141          | 11.157          | CU-8               | 9.273           | 9.342           | 9.364           |
| PAPR-10            | 12.294          | 12.217          | 12.156          | <b>SAPR-8</b>      | <b>0.390</b>    | <b>0.351</b>    | <b>0.351</b>    |
| JBCCU-10           | 11.163          | 10.988          | 10.795          | TDD-8              | 1.460           | 1.504           | 1.506           |
| JBCSAPR-10         | 3.972           | 3.842           | 3.928           | JGBF-8             | 15.978          | 15.966          | 16.006          |
| JMBIC-10           | 8.063           | 8.009           | 8.095           | JETBPY-8           | 27.810          | 27.929          | 28.164          |
| JATDI-10           | 16.957          | 16.899          | 17.078          | JBTPR-8            | 2.122           | 2.122           | 2.081           |
| <b>JSPC-10</b>     | <b>2.353</b>    | <b>2.324</b>    | <b>2.158</b>    | BTPR-8             | 1.812           | 1.809           | 1.793           |
| SDD-10             | 4.261           | 4.300           | 4.163           | JSD-8              | 4.094           | 4.122           | 4.099           |
| TD-10              | 3.263           | 3.272           | 3.173           | TT-8               | 10.079          | 10.141          | 10.147          |
| HD-10              | 9.059           | 8.948           | 8.828           | ETBPY-8            | 23.771          | 23.865          | 24.089          |

| Code | Label    | Symmetry | Shape                                        |
|------|----------|----------|----------------------------------------------|
| 1    | HBPY-8   | D6h      | Hexagonal bipyramid                          |
| 2    | CU-8     | Oh       | Cube                                         |
| 3    | SAPR-8   | D4d      | Square antiprism                             |
| 4    | TDD-8    | D2d      | Triangular dodecahedron                      |
| 5    | JGBF-8   | D2d      | Johnson gyrobifastigium (J26)                |
| 6    | JETBPY-8 | D3h      | Johnson elongated triangular bipyramid (J14) |
| 7    | JBTPR-8  | C2v      | Biaugmented trigonal prism (J50)             |
| 8    | BTPR-8   | C2v      | Biaugmented trigonal prism                   |
| 9    | JSD-8    | D2d      | Snub diphenoid (J84)                         |
| 10   | TT-8     | Td       | Triakis tetrahedron                          |
| 11   | ETBPY-8  | D3h      | Elongated trigonal bipyramid                 |

| Code | Label      | Symmetry | Shape                                     |
|------|------------|----------|-------------------------------------------|
| 1    | OBPY-10    | D8h      | Octagonal bipyramid                       |
| 2    | PPR-10     | D5h      | Pentagonal prism                          |
| 5    | PAPR-10    | D5d      | Pentagonal antiprism                      |
| 6    | JBCCU-10   | D4h      | Bicapped cube (J15)                       |
| 7    | JBCSAPR-10 | D4d      | Bicapped square antiprism (J17)           |
| 8    | JMBIC-10   | C2v      | Metabidiminished icosahedron (J62)        |
| 9    | JATDI-10   | C3v      | Augmented tridiminished icosahedron (J64) |
| 10   | JSPC-10    | C2v      | Sphenocorona (J87)                        |
| 11   | SDD-10     | D2       | Staggered Dodecahedron (2:6:2)            |
| 12   | TD-10      | C2v      | Tetradecahedron (2:6:2)                   |
| 13   | HD-10      | D4h      | Hexadecahedron (2:6:2) or (1:4:4:1)       |

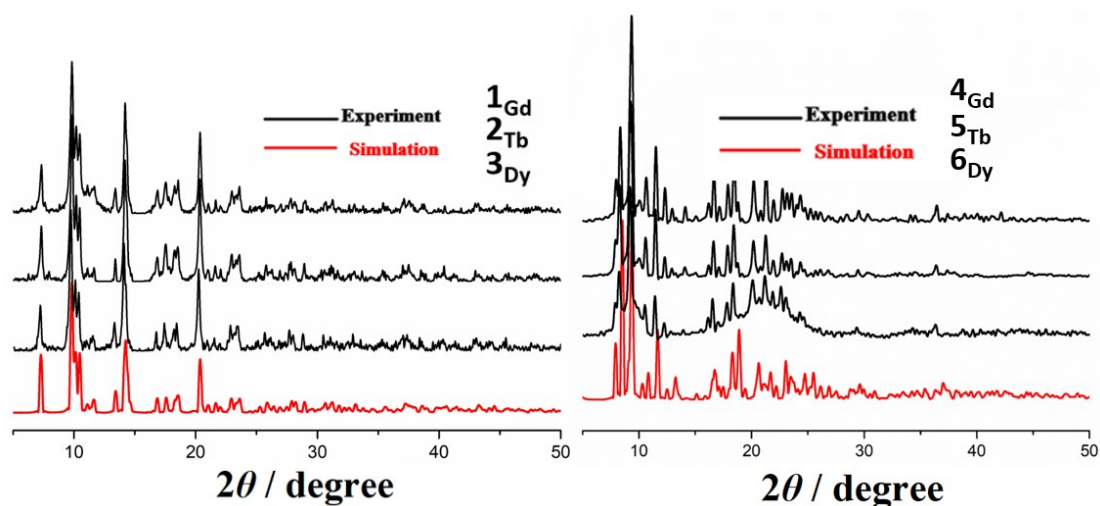

Figure S1 X-ray powder diffraction patterns of complexes  $1_{\text{Gd}}-6_{\text{Dy}}$ .

## 2. Synthesis of BNITImH-C2/-C4 biradicals and Packing diagrams of $1_{\text{Gd}}-6_{\text{Dy}}$

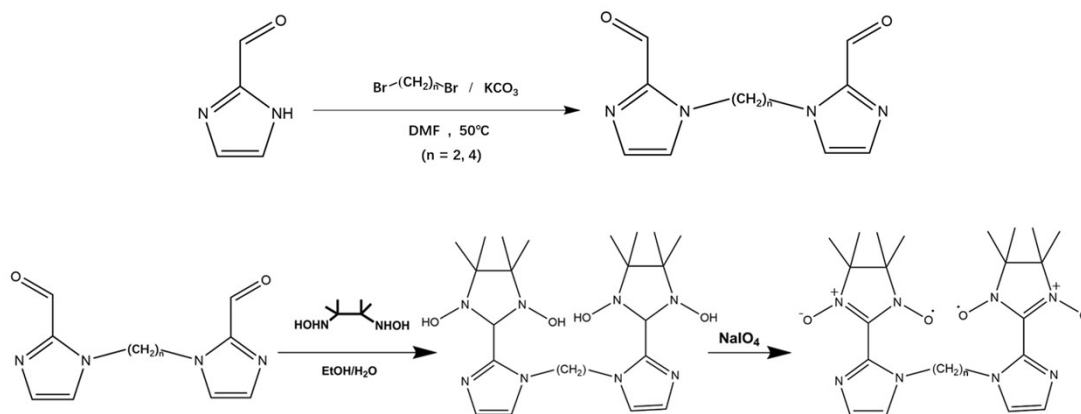

Scheme S1 The synthesis of BNITImH-C2/-C4 biradicals.

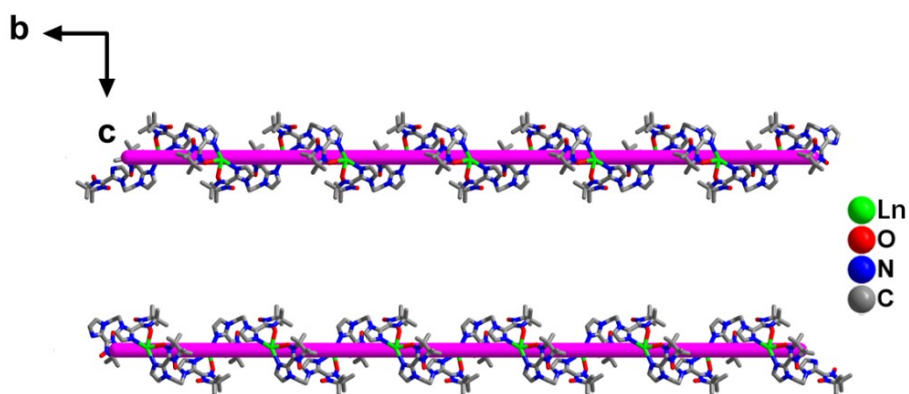

**Figure S2** The chiral helical chains of  $1_{\text{Gd}}-3_{\text{Dy}}$  along b axis in which H, F, MeOH molecules and nitrates are omitted for clarity. The helical chains are all of the same right-hand helix.

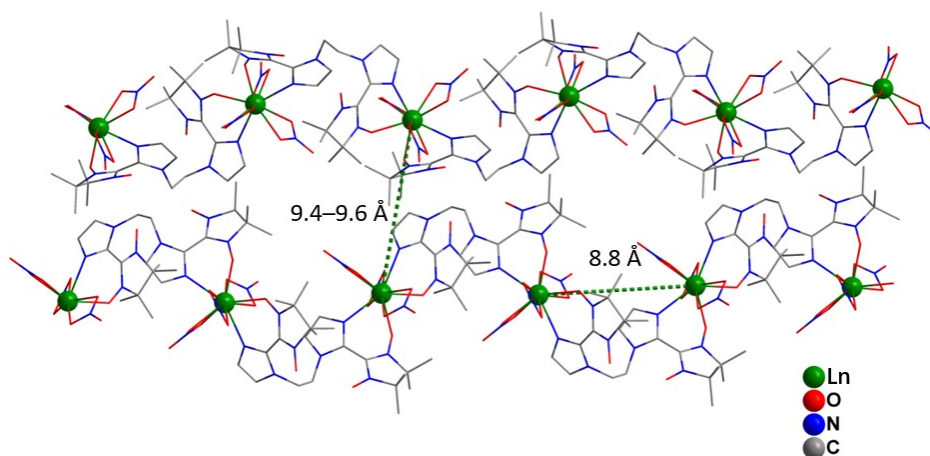

**Figure S3** Packing diagram of  $1_{\text{Gd}}-3_{\text{Dy}}$  (H, F, and MeOH molecules are omitted).

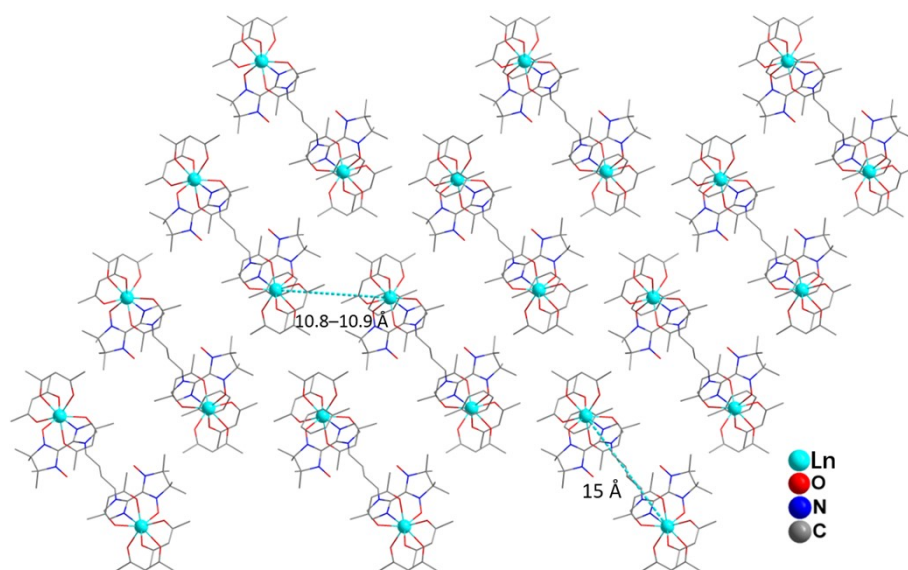

**Figure S4** Packing diagram of  $4_{\text{Gd}}-6_{\text{Dy}}$  (H, F, and toluene molecules are omitted).



### 3. Magnetic Properties

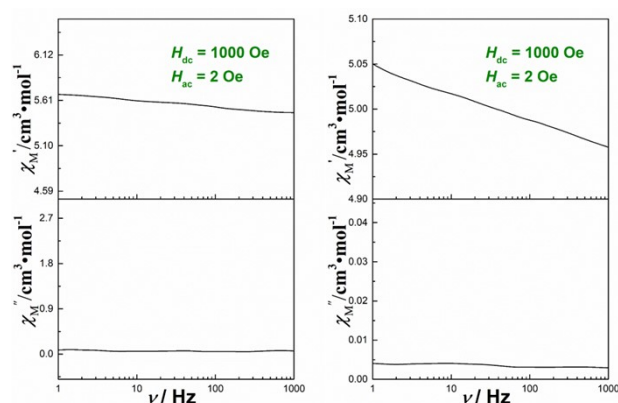

**Figure S5** Frequency-dependent ac signals for  $2\text{Tb}$  (left) and  $3\text{Dy}$  (right) at 2 K under a 1000 Oe dc field.

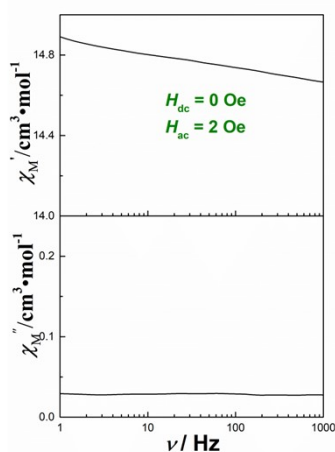

**Figure S6** Frequency-dependent ac signals for  $6\text{Dy}$  at 2 K under a 0 Oe dc field.

**Table S8** Relaxation fitting parameters from the least-square fitting of the Cole-Cole plots of  $5\text{Tb}$  under a 0 Oe dc field according to the generalized Debye model.

| Temperature / K | $\chi_s / \text{cm}^3\text{mol}^{-1}\text{K}$ | $\chi_T / \text{cm}^3\text{mol}^{-1}\text{K}$ | $\tau / \text{s}$ | $\alpha$ |
|-----------------|-----------------------------------------------|-----------------------------------------------|-------------------|----------|
| 2.0             | 1.24                                          | 9.29                                          | 0.000428          | 0.31682  |
| 2.2             | 1.21                                          | 8.44                                          | 0.000411          | 0.29384  |
| 2.4             | 1.26                                          | 7.71                                          | 0.000390          | 0.25438  |
| 2.6             | 1.30                                          | 7.11                                          | 0.000348          | 0.20574  |
| 2.8             | 1.28                                          | 6.56                                          | 0.000280          | 0.15325  |
| 3.0             | 1.24                                          | 6.11                                          | 0.000212          | 0.11026  |
| 3.2             | 1.19                                          | 5.73                                          | 0.000153          | 0.081763 |
| 3.4             | 1.13                                          | 5.40                                          | 0.000108          | 0.064986 |
| 3.6             | 1.11                                          | 5.10                                          | 0.0000767         | 0.053987 |
| 3.8             | 0.955                                         | 4.84                                          | 0.0000519         | 0.053737 |
| 4.0             | 0.842                                         | 4.60                                          | 0.0000360         | 0.050788 |

**Table S9** Relaxation fitting parameters from the least-square fitting of the Cole-Cole plots of **5<sub>Tb</sub>** under a 1000 Oe dc field according to the generalized Debye model.

| Temperature / K | $\chi_s / \text{cm}^3\text{mol}^{-1}\text{K}$ | $\chi_T / \text{cm}^3\text{mol}^{-1}\text{K}$ | $\tau / \text{s}$ | $\alpha$ |
|-----------------|-----------------------------------------------|-----------------------------------------------|-------------------|----------|
| 2.0             | 0.64                                          | 9.98                                          | 0.0570            | 0.45708  |
| 2.2             | 0.84                                          | 8.03                                          | 0.0174            | 0.28972  |
| 2.4             | 0.73                                          | 7.37                                          | 0.00719           | 0.23526  |
| 2.6             | 0.67                                          | 6.80                                          | 0.00289           | 0.17906  |
| 2.8             | 0.64                                          | 6.20                                          | 0.00126           | 0.13252  |
| 3.0             | 0.63                                          | 5.88                                          | 0.000617          | 0.11821  |
| 3.2             | 0.66                                          | 5.45                                          | 0.000325          | 0.093048 |
| 3.4             | 0.70                                          | 5.20                                          | 0.000190          | 0.087682 |
| 3.6             | 0.81                                          | 4.92                                          | 0.000120          | 0.068913 |
| 3.8             | 0.94                                          | 4.73                                          | 0.0000796         | 0.066294 |
| 4.0             | 0.11                                          | 4.51                                          | 0.0000558         | 0.055982 |
| 4.3             | 0.91                                          | 4.21                                          | 0.0000300         | 0.042262 |

#### 4. Details for calculations

Complex **2<sub>Tb</sub>** has two NO radicals while **5<sub>Tb</sub>** has one NO radical. For each of them, the magnetic anisotropy energy barrier mainly comes from individual Tb<sup>III</sup> ions considering the magnetic isotropy of NO radicals. Thus, complete-active-space self-consistent field (CASSCF) calculations on individual Tb<sup>III</sup> fragments have been carried out with OpenMolcas<sup>S1</sup> program package. During the above calculations, the spin values on all NO radicals have been set as zero by adding one electron to each of them. The calculated structures of complexes **2<sub>Tb</sub>** and **5<sub>Tb</sub>** are shown in Figure S7. The basis sets for all atoms are atomic natural orbitals from the ANO-RCC library: ANO-RCC-VTZP for Tb<sup>III</sup>; VTZ for close O and N; VDZ for distant atoms. The calculations employed the second-order Douglas-Kroll-Hess Hamiltonian, where scalar relativistic contractions were considered in the basis set and the spin-orbit couplings were handled separately in the restricted active space state interaction (RASSI-SO) procedure.<sup>S2,S3</sup> Active electrons in 7 active orbitals include all *f* electrons CAS(8 in 7) for Tb<sup>III</sup> in the CASSCF calculations. To exclude all the doubts, we calculated all the roots in the active space. We have mixed the maximum number of spin-free states which was possible with our hardware (all from 7 septets, all from 140 quintets, and 68 from 500 triplets for Tb<sup>III</sup>). SINGLE\_ANISO<sup>S4-S6</sup> program was used to obtain the energy levels, *g* tensors, magnetic axes, *et al.*, based on the above CASSCF/RASSI-SO calculations.

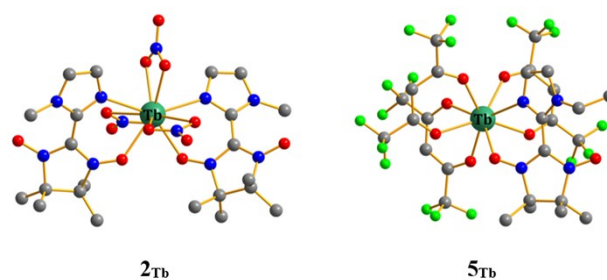

**Figure S7** Calculated structures of complexes  $2_{\text{Tb}}$  and  $5_{\text{Tb}}$ ; H atoms are omitted for clarity.

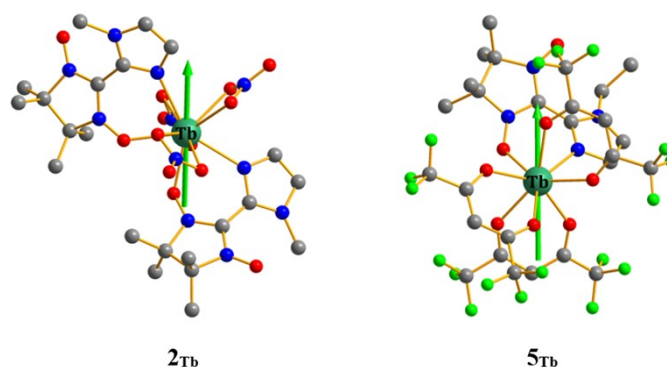

**Figure S8** Calculated orientations of the local main magnetic axes in the ground spin-orbit states on  $\text{Tb}^{\text{III}}$  ions of  $2_{\text{Tb}}$  and  $5_{\text{Tb}}$ .

**Table S10** Calculated energy levels ( $\text{cm}^{-1}$ ),  $g$  ( $g_x, g_y, g_z$ ) tensors, and predominant  $m_J$  values of the lowest seven spin-orbit states of individual  $\text{Tb}^{\text{III}}$  fragments of complexes  $2_{\text{Tb}}$  and  $5_{\text{Tb}}$  using CASSCF/RASSI-SO with OpenMolcas.

|   | $2 (\text{Tb}^{\text{III}})$ |        |         | $5 (\text{Tb}^{\text{III}})$ |                 |         |
|---|------------------------------|--------|---------|------------------------------|-----------------|---------|
|   | $E/\text{cm}^{-1}$           | $g$    | $m_J$   | $E/\text{cm}^{-1}$           | $g$             | $m_J$   |
| 1 | 0.0                          | 0.000  | $\pm 6$ | 0.0                          | 0.000           | $\pm 6$ |
|   | 3.4                          | 16.804 |         | 0.8                          | 17.369          |         |
| 2 | 26.1                         | 0.000  | $\pm 5$ | 81.0                         | 0.000           | $\pm 5$ |
|   | 33.7                         | 12.550 |         | 96.8                         | 12.191          |         |
| 3 | 45.9                         | 0.000  |         | 116.0                        |                 |         |
|   | 54.3                         | 10.943 |         |                              |                 |         |
|   | 80.2                         |        |         | 129.5                        | 0.000           |         |
|   |                              |        |         | 132.3                        | 0.000<br>15.374 |         |

|   |       |        |  |       |        |  |
|---|-------|--------|--|-------|--------|--|
| 5 | 92.5  | 0.000  |  | 175.0 | 0.000  |  |
|   | 104.8 | 8.996  |  | 178.1 | 10.132 |  |
| 6 | 108.6 | 0.000  |  | 264.2 | 0.000  |  |
|   | 111.6 | 14.740 |  | 264.4 | 13.580 |  |
| 7 | 205.7 | 0.000  |  | 356.1 | 0.000  |  |
|   | 205.8 | 17.736 |  | 357.5 | 16.684 |  |

**Table S11** Wave functions with definite projections of the total moment  $|m_J\rangle$  for the lowest two spin-orbit states of individual Tb<sup>III</sup> fragments of  $2_{Tb}$  and  $5_{Tb}$  using CASSCF/RASSI-SO with OpenMolcas.

|          | $E/\text{cm}^{-1}$ | wave functions                                                            |
|----------|--------------------|---------------------------------------------------------------------------|
| $2_{Tb}$ | 0.0                | 86.0% $ 6\rangle$ +6.2% $ 2\rangle$                                       |
|          | 3.4                | 94.2% $ 6\rangle$                                                         |
|          | 26.1               | 32.0% $ 5\rangle$ +31.2% $ 1\rangle$ +21.4% $ 4\rangle$ +9.6% $ 3\rangle$ |
|          | 33.7               | 45.4% $ 5\rangle$ +23.8% $ 4\rangle$ +16.4% $ 2\rangle$ +4.9% $ 0\rangle$ |
| $5_{Tb}$ | 0.0                | 91.8% $ 6\rangle$                                                         |
|          | 0.8                | 93.2% $ 6\rangle$                                                         |
|          | 81.0               | 52.6% $ 5\rangle$ +27.4% $ 3\rangle$ +15.8% $ 1\rangle$                   |
|          | 96.8               | 73.4% $ 5\rangle$ +19.8% $ 3\rangle$                                      |

**Table S12** Calculated crystal-field parameters  $B(k, q)$  and the corresponding weights for individual Tb<sup>III</sup> fragments of  $2_{Tb}$  and  $5_{Tb}$  using CASSCF/RASSI-SO with OpenMolcas.

| $2$ (Tb <sup>III</sup> ) |     |                        |             | $5$ (Tb <sup>III</sup> ) |     |                        |             |
|--------------------------|-----|------------------------|-------------|--------------------------|-----|------------------------|-------------|
| $k$                      | $q$ | $B(k, q)$              | Weights (%) | $k$                      | $q$ | $B(k, q)$              | Weights (%) |
| 2                        | -2  | $0.11 \times 10^1$     | 11.85       | 2                        | 0   | $-0.17 \times 10^1$    | 12.24       |
| 2                        | 1   | 0.91                   | 9.77        | 2                        | 1   | $0.17 \times 10^1$     | 11.92       |
| 2                        | 0   | -0.85                  | 9.14        | 4                        | -4  | $0.13 \times 10^{-1}$  | 11.00       |
| 4                        | 3   | $0.52 \times 10^{-2}$  | 6.57        | 4                        | 1   | $-0.10 \times 10^{-1}$ | 8.23        |
| 2                        | -1  | 0.57                   | 6.12        | 2                        | -2  | $-0.11 \times 10^1$    | 8.09        |
| 4                        | 1   | $-0.46 \times 10^{-2}$ | 5.80        | 4                        | -2  | $-0.73 \times 10^{-2}$ | 6.03        |
| 2                        | 2   | 0.48                   | 5.18        | 4                        | 2   | $0.73 \times 10^{-2}$  | 5.98        |
| 4                        | -1  | $-0.41 \times 10^{-2}$ | 5.12        | 4                        | 0   | $-0.67 \times 10^{-2}$ | 5.50        |
| 6                        | 6   | $-0.63 \times 10^{-4}$ | 4.58        | 2                        | 2   | 0.71                   | 5.01        |

To fit the exchange interactions between the magnetic centers and NO radicals in  $2_{Tb}$  and  $5_{Tb}$ , we took two steps to obtain them. Firstly, we calculated individual Tb<sup>III</sup> fragments using

CASSCF/RASSI-SO to obtain the corresponding magnetic properties. Then, the exchange interactions between the magnetic centers and NO radicals were considered within the Lines model.<sup>S7</sup> The Lines model is effective and has been successfully used in the research field of *3d* and *4f*-elements single-molecule magnets.<sup>S8,S9</sup>

The Ising exchange Hamiltonian is:

$$\hat{H} = -2J_1(\hat{S}_{Rad1}\hat{S}_{Tb} + \hat{S}_{Rad2}\hat{S}_{Tb}) - 2J_2\hat{S}_{Rad1}\hat{S}_{Rad2} \quad \text{for } \mathbf{2}_{Tb} \quad (\text{S1}).$$

$$\hat{H} = -2J_1(\hat{S}_{Rad1}\hat{S}_{Tb1} + \hat{S}_{Rad2}\hat{S}_{Gd2}) \quad \text{for } \mathbf{5}_{Tb} \quad (\text{S2})$$

where  $J_1$  is the parameter of the total effective magnetic coupling constant between Tb<sup>III</sup> and NO with respect to the ground pseudospin of  $\tilde{S}_{Tb} = 1/2$  on the Tb<sup>III</sup> sites and the spin  $S_{Rad} = 1/2$  on the NO radicals.  $J_2$  is the parameter of the total magnetic coupling constant between NO radicals in  $\mathbf{2}_{Tb}$ . The Lines exchange coupling constants  $J$  ( $\tilde{J}_1 = 6J_1$  and  $\tilde{J}_2 = J_2$  for  $\mathbf{2}_{Tb}$  and  $\mathbf{5}_{Tb}$ ) were fitted through a comparison of the computed and measured magnetic susceptibilities using the POLY\_ANISO program.<sup>S4-S6</sup>

**Table S13** Exchange energies  $E$  (cm<sup>-1</sup>) and the main values of the  $g_z$  for the lowest two or four exchange doublets of  $\mathbf{2}_{Tb}$  and  $\mathbf{5}_{Tb}$ .

|   | $\mathbf{2}_{Tb}$  |        | $\mathbf{5}_{Tb}$  |        |
|---|--------------------|--------|--------------------|--------|
|   | $E/\text{cm}^{-1}$ | $g_z$  | $E/\text{cm}^{-1}$ | $g_z$  |
| 1 | 0.000              | 20.130 | 0.000              | 11.122 |
|   | 0.055              |        | 0.000              |        |
| 2 | 3.208              | 0.000  | 1.145              | 15.119 |
|   | 3.891              |        | 1.145              |        |
| 3 | 6.637              | 0.000  |                    |        |
|   | 7.426              |        |                    |        |
| 4 | 11.367             | 11.641 |                    |        |
|   | 11.540             |        |                    |        |

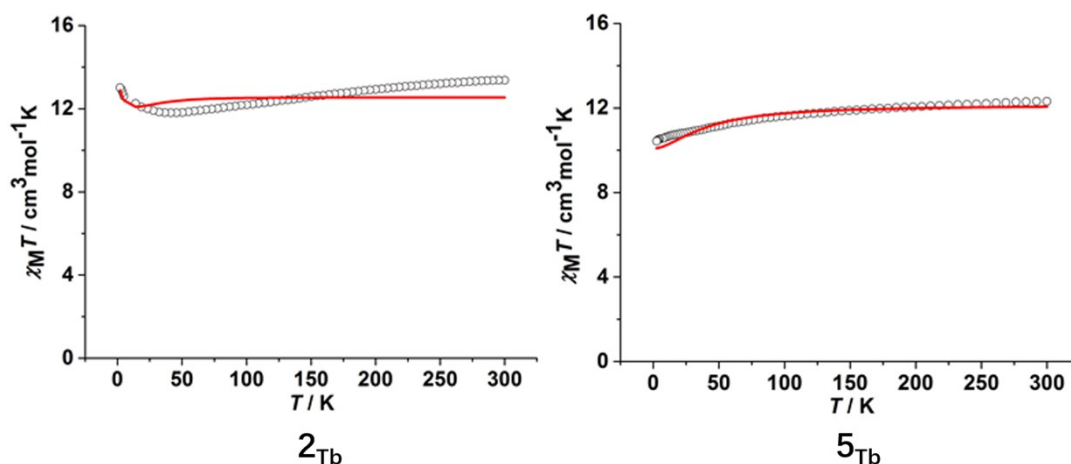

**Figure S9** Calculated (red solid line) and experimental (black circle dot) data of magnetic susceptibilities of  $2_{\text{Tb}}$  and  $5_{\text{Tb}}$ . The intermolecular interaction parameters  $zJ'$  of  $2_{\text{Tb}}$  and  $5_{\text{Tb}}$  were fitted to  $0.000$  and  $0.020 \text{ cm}^{-1}$ , respectively.

#### References:

- S1 Galván, I. F.; Vacher, M.; Alavi, A.; Angeli, C.; Aquilante, F.; Autschbach, J.; Bao, J. J.; Bokarev, S. I.; Bogdanov, N. A.; Carlson, R. K.; Chibotaru, L. F.; Creutzberg, J.; Dattani, N.; Delcey, M. G.; Dong, S. S.; Dreuw, A.; Freitag, L.; Frutos, L. M.; Gagliardi, L.; Gendron, F.; Giussani, A.; González, L.; Grell, G.; Guo, M. Y.; Hoyer, C. E.; Johansson, M.; Keller, S.; Knecht, S.; Kovacevic, G.; Källman, E.; Manni, G. L.; Lundberg, M.; Ma, Y. J.; Mai, S.; Malhado, J. P.; Malmqvist, P. Å.; Marquetand, P.; Mewes, S. A.; Norell, J.; Olivucci, M.; Oppel, M.; Phung, Q. M.; Pierloot, K.; Plasser, F.; Reiher, M.; Sand, A. M.; Schapiro, I.; Sharma, P.; Stein, C. J.; Sørensen, L. K.; Truhlar, D. G.; Ugandi, M.; Ungur, L.; Valentini, A.; Vancoillie, S.; Veryazov, V.; Weser, O.; Wesolowski, T. A.; Widmark, Per-Olof.; Wouters, S.; Zech, A.; Zobel, J. P.; Lindh, R. *J. Chem. Theory Comput.* **2019**, *15*, 5925–5964.
- S2 Malmqvist, P. Å.; Roos, B. O.; Schimmelpfennig, B. *Chem. Phys. Lett.*, **2002**, *357*, 230–240.
- S3 Heß, B. A.; Marian, C. M.; Wahlgren, U.; Gropen, O. *Chem. Phys. Lett.*, **1996**, *251*, 365–371.
- S4 Chibotaru, L. F.; Ungur, L.; Soncini, A. *Angew. Chem., Int. Ed.* **2008**, *47*, 4126–4129.
- S5 Ungur, L.; Van den Heuvel, W.; Chibotaru, L. F. *New J. Chem.* **2009**, *33*, 1224–1230.
- S6 Chibotaru, L. F.; Ungur, L.; Aronica, C.; Elmoll, H.; Pilet, G.; Luneau, D. *J. Am. Chem. Soc.* **2008**, *130*, 12445–12455.
- S7 Lines, M. E. *J. Chem. Phys.* **1971**, *55*, 2977–2984.
- S8 Mondal, K. C.; Sundt, A.; Lan, Y. H.; Kostakis, G. E.; Waldmann, O.; Ungur, L.; Chibotaru, L. F.; Anson, C. E.; Powell, A. K. *Angew. Chem., Int. Ed.* **2012**, *51*, 7550–7554.
- S9 Langley, S. K.; Wielechowski, D. P.; Vieru, V.; Chilton, N. F.; Moubaraki, B.; Abrahams, B. F.; Chibotaru, L. F.; Murray, K. S. *Angew. Chem., Int. Ed.* **2013**, *52*, 12014–12019.
